# Supplementary material
Source: publisher figshare collection journal article supplement (https://tandf.figshare.com/articles/dataset/_/18282497)
Supplement: Supplementary file 2 [file 1]

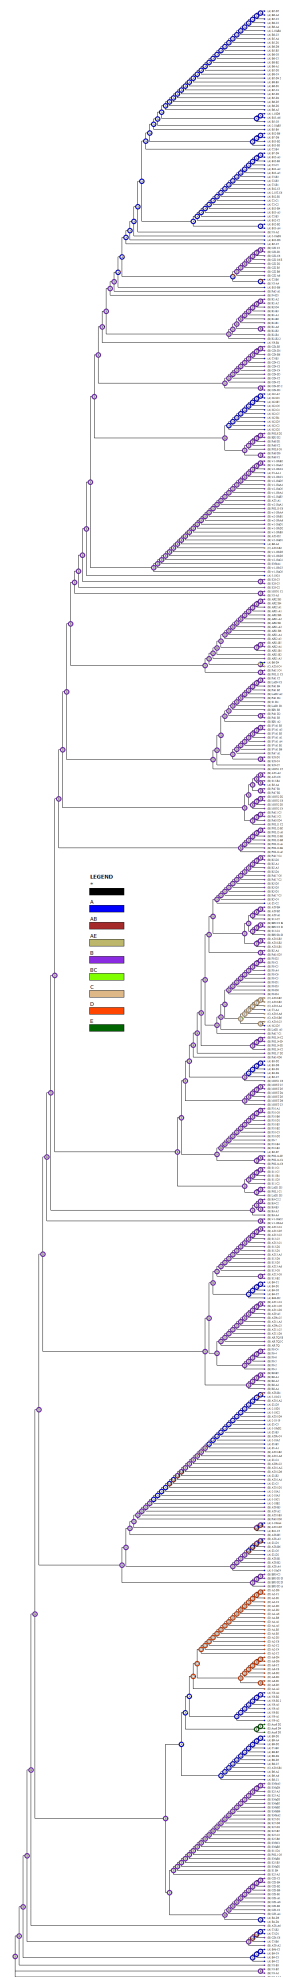

**Supplementary fig. S3.** Summary of the ancestral character state reconstruction analysis based on Bayesian Binary MCMC (BBM) model in *Microcoleus* spp. The ancestral habitats with the highest likelihood are represented within node pies. Color code corresponds to the following habitats: (A) puddle, (B) soil, (C) concrete, (D) moss vegetation, (E) rocks. The black asterisk represents other ancestral habitats. Additional colors within the color code correspond to the multiple character states (AB, AE, BC).
